# Supplementary material
Source: PubMed Central journal article supplement (PMC1464827)

(A)

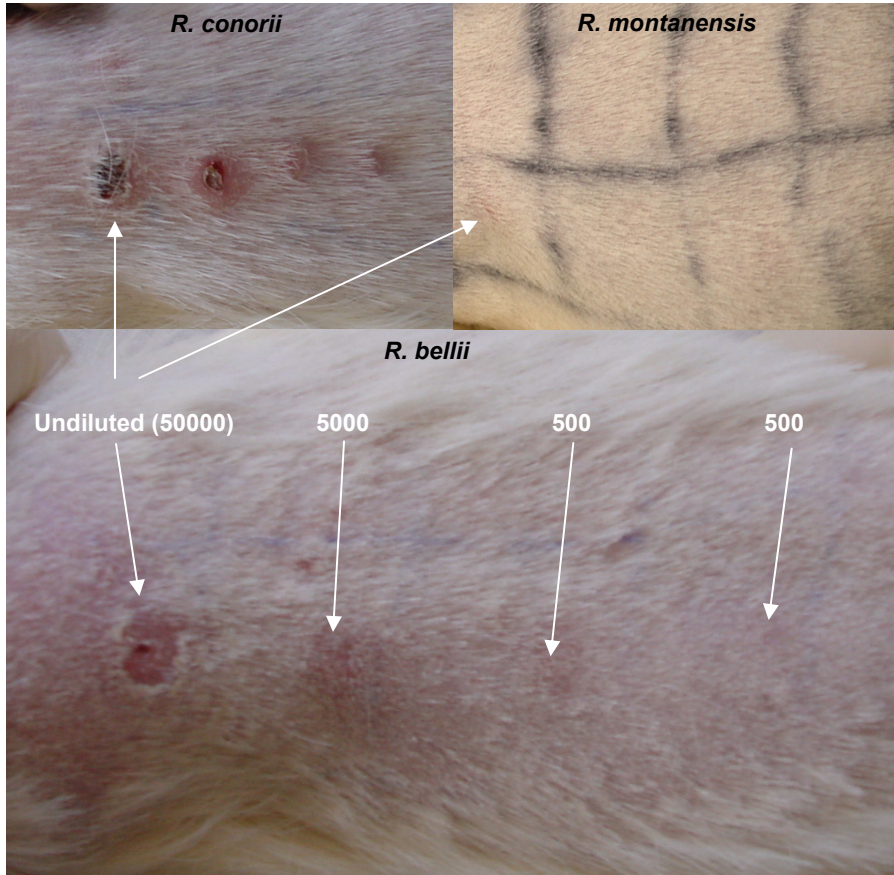

(B)

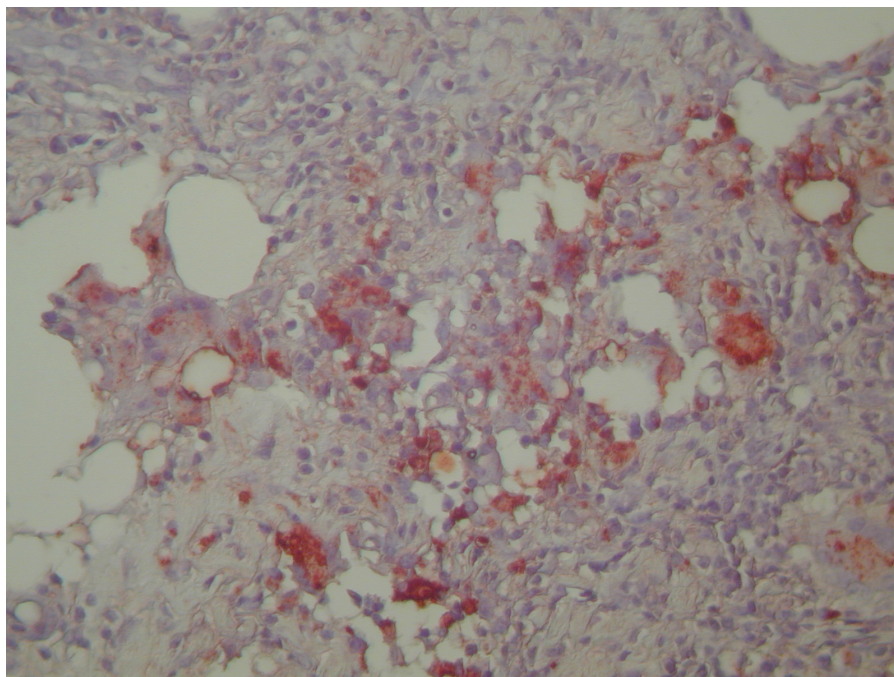

Fig. S9

Supplement: pgen.0020076.sg009.pdf [file pgen.0020076.sg009.pdf]
